# Supplementary material for: Evolutionary and Functional Insights into PSI-Containing Aspartic Proteinases in Tomato
Source: Research Square preprint supplement (doi:10.21203/rs.3.rs-7245797/v1), 2025-08-14
Supplement: Supplementary file 1 [file 493a7801602c98c1a086e44d.docx]

# Attachments

**Supplementary table 1** - List of primers used for qPCR of *Solanum lycopersium* PSI-containing APs and reference genes.

| Gene/sequence | Primer name | Primer sequence | Amplicon length  (bp) |
| --- | --- | --- | --- |
| *PSI V* | PSI V Fw | TACTCGTAATGGCACGTCTGG | 94 |
| PSI V Rv | ACCACTCTCATCATTCGGTAGC |
| *PSI W* | PSI W Fw | TCGGTTTATGCTCTAGGGATGG | 127 |
| PSI W Rv | CTCACAAACCCTGCACATCTC |
| *PSI X* | PSI X Fw | CGCTTTGGGAACGATTGCTTTC | 109 |
| PSI X Rv | CGCATTCTCATTTGGGGTTCATG |
| *PSI Y* | PSI Y Fw | TGCTTGTGAAATGGCAGTCG | 92 |
| PSI Y Rev | TATGCGATCTTGAGTCTGGTT |
| *PSI Z* | PSI Z Fw | TGCTTTCTTGATGGATCTCAGC | 120 |
| PSI Z Rv | AACAACTGCCATCTCACAGG |
| *Ubi* | Fw | TCGTAAGGAGTGCCCTAATGCTGA | 119 |
| Rv | CAATCGCCTCCAGCCTTGTTGTAA |
| *EF1α* | Fw | GATTGACAGACGTTCTGGTAAGGA | 67 |
| Rv | ACCGGCATCACCATTCTTCA |

**Supplementary table 2** - List of primers used for cloning the *Solanum lycopersicum* PSIs to be used in Agrobacterium-mediated transient expression in *Nicotiana tabacum*.

| Gene/sequence | Primer name | Primer sequence | Amplicon length  (bp) |
| --- | --- | --- | --- |
| PSI W | PSI W Fw | ATCATTATCCTCGGCCGAATTCACGGTTGTCAGCCAG | 343 |
| PSI X | PSI X Fw | ATCATTATCCTCGGCCGAATTCACGGTTAGTTCGCAT | 331 |
| PSI Z | PSI Z Fw | ATCATTATCCTCGGCCGAATTCACGATAGTTAGCATG | 349 |
| - | PSIs Rv | TCCTCCTCGCCCTTGCTCACCATTGACGCACCACCTG |  |
